# Supplementary material
Source: MDPI journal article supplement (https://www.mdpi.com/2073-4344/12/7/682)
Supplement: s1 [file s1]

# **Unveiling the potential of novel struvite-humic acid composite extracted from anaerobic digestate for adsorption and reduction of chromium**

Xiqing Wang<sup>1,2</sup>, Atif Muhmood<sup>3</sup>, Haizhong Yu<sup>1</sup>, Yuqi Li<sup>1</sup>, Wenying Fan<sup>1</sup>, Pengjiao Tian<sup>1\*</sup>

<sup>1</sup>*College of Food Science Technology and Chemical Engineering, Hubei University of Arts and Science, Xiangyang, Hubei, 441053, China*

<sup>2</sup>*College of Engineering, China Agricultural University, Beijing, 10083, China*

<sup>3</sup>*Institute of Soil Chemistry & Environmental Sciences, AARI, Pakistan.*

\* Correspondence. E-mail: [13120018505@163.com](mailto:13120018505@163.com)

**Supporting Materials:** 4 pages, 3 Figures.

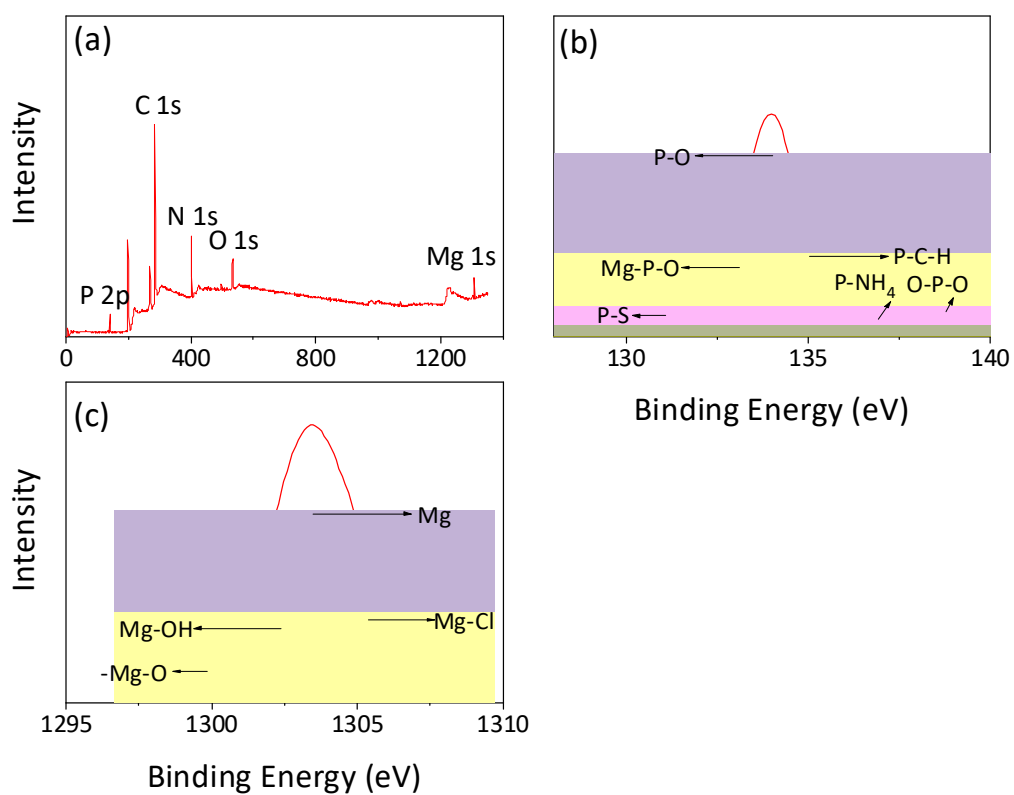

Figure S1. XPS spectra of struvite-humic acid composite, (a) low-resolution, (b) High-resolution P 2p, and (c) Mg 1s

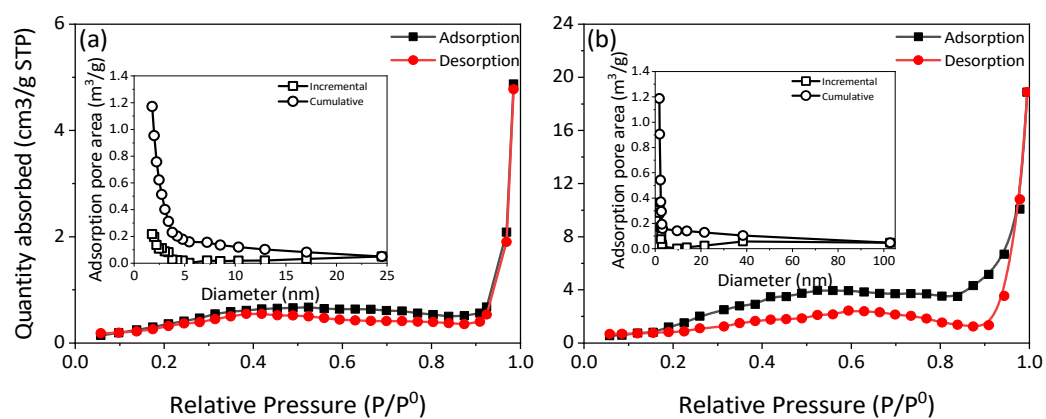

Figure S2. N<sub>2</sub> adsorption and desorption isotherms of (a) humic acid and (b) struvite-humic acid composite

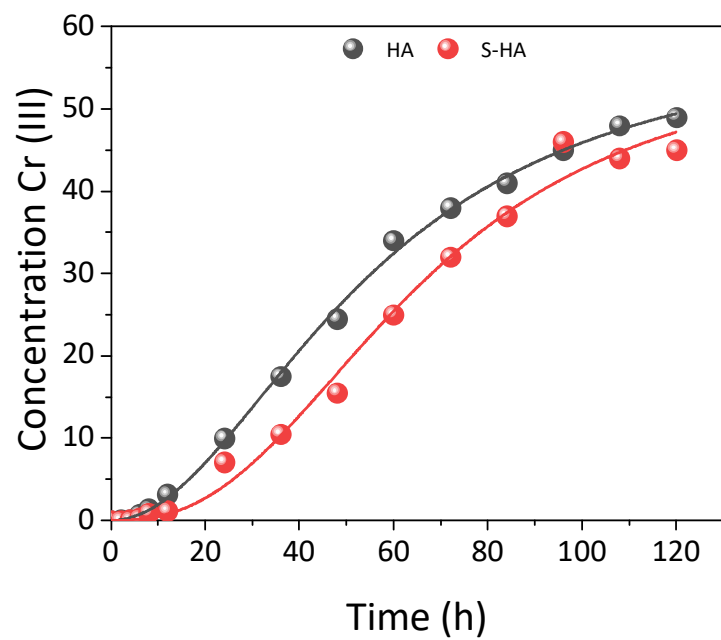

Figure S3. Change of Cr (III) concentration in the humic acid (HA) and struvite-humic acid composite (S-HA)
